# Supplementary material for: The Lipid Paradox is present in ST-elevation but not in non-ST-elevation myocardial infarction patients: Insights from the Singapore Myocardial Infarction Registry
Source: PubMed Central journal article supplement (PMC7176706; doi:10.1038/s41598-020-63825-8), 2020-04-22
Supplement: 41598_2020_63825_MOESM1_ESM.pdf [file 41598_2020_63825_MOESM1_ESM.pdf]

## **Supplementary Data**

### **The Lipid Paradox is present in ST-elevation but not in non-ST-elevation myocardial infarction patients: Insights from the Singapore Myocardial Infarction Registry**

Ching-Hui Sia<sup>1,2</sup>, Huili Zheng<sup>3</sup>, Andrew Fu-Wah Ho<sup>4,5,6</sup>, Heerajnarain Bulluck<sup>7</sup>, Jun Chong<sup>5,6</sup>, David Foo<sup>8</sup>, Ling-Li Foo<sup>3</sup>, Patrick Zhan Yun Lim<sup>9</sup>, Boon Wah Liew<sup>10</sup>, Huay-Cheem Tan<sup>1</sup>, Tiong-Cheng Yeo<sup>1,2</sup>, Terrance Chua<sup>11</sup>, Mark Yan-Yee Chan<sup>1,2</sup>, Derek J Hausenloy<sup>2,5,6,12,13,14</sup>

<sup>1</sup> Department of Cardiology, National University Heart Centre Singapore, Singapore

<sup>2</sup> Yong Loo Lin School of Medicine, National University of Singapore, Singapore

<sup>3</sup> Health Promotion Board, National Registry of Diseases Office, Singapore, Singapore

<sup>4</sup> SingHealth Duke-NUS Emergency Medicine Academic Clinical Programme, Singapore

<sup>5</sup> Cardiovascular & Metabolic Disorders Program, Duke-NUS Medical School, Singapore

<sup>6</sup> National Heart Research Institute Singapore, National Heart Centre Singapore, Singapore

<sup>7</sup> Norfolk and Norwich University Hospital, Norwich, United Kingdom

<sup>8</sup> Tan Tock Seng Hospital, Singapore, Singapore

<sup>9</sup> Khoo Teck Puat Hospital, Singapore, Singapore

<sup>10</sup> Changi General Hospital, Singapore

<sup>11</sup> Department of Cardiology, National Heart Centre Singapore, Singapore

<sup>12</sup> The Hatter Cardiovascular Institute, University College London, London, United Kingdom

<sup>13</sup> Cardiovascular Research Center, College of Medical and Health Sciences, Asia University, Taiwan

<sup>14</sup> Tecnologico de Monterrey, Centro de Biotecnologia-FEMSA, Nuevo Leon, Mexico

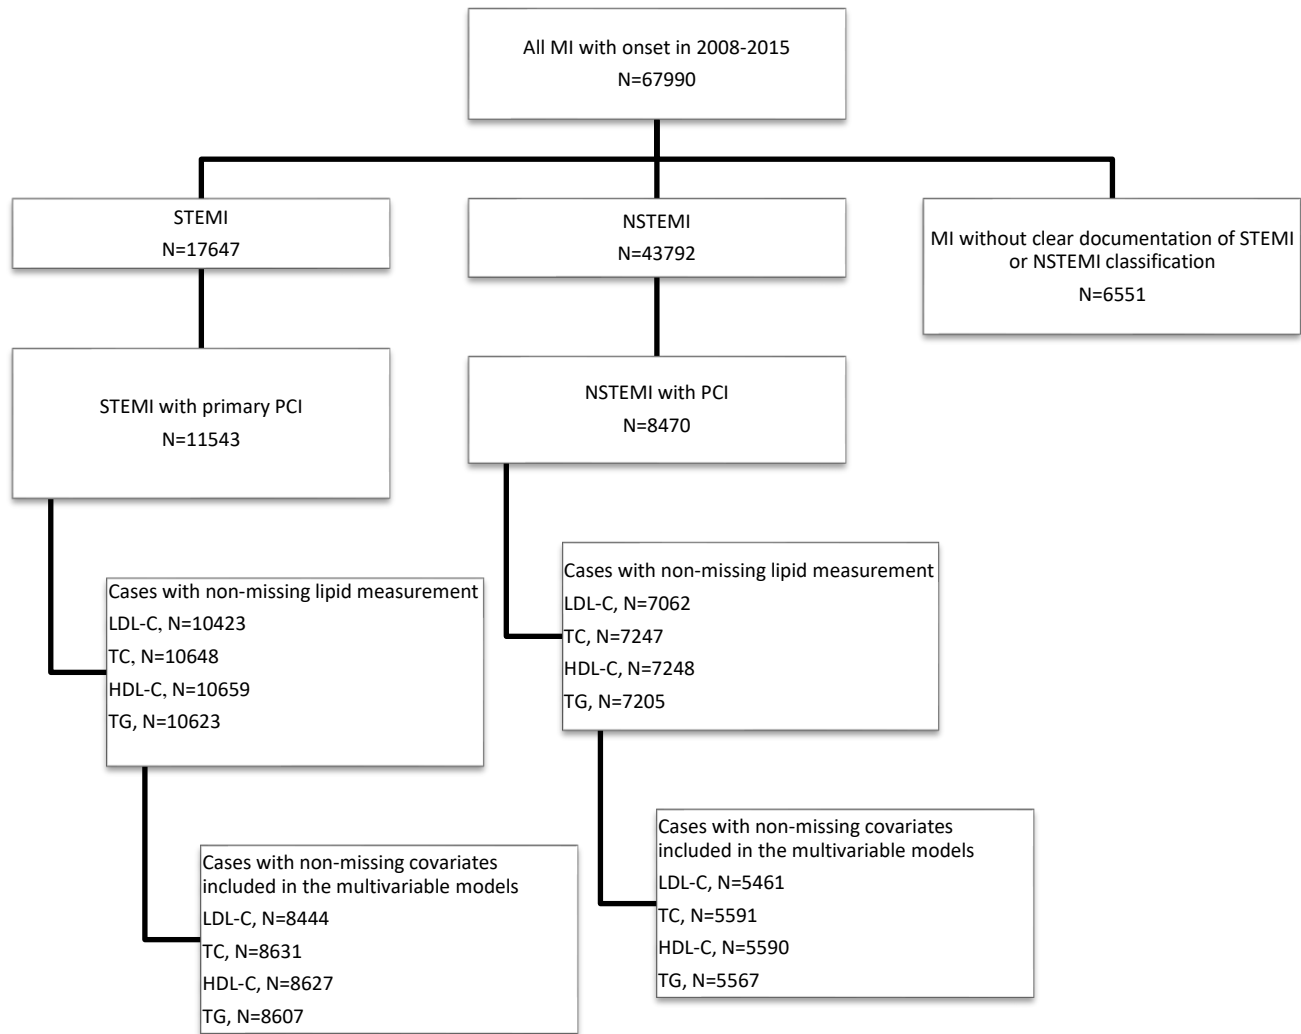

**Supplementary Figure 1. Flow diagram of patients used for analysis.**

Abbreviations: HDL-C, high-density lipoprotein cholesterol; LDL-C, low-density lipoprotein cholesterol; NSTEMI, non-ST segment elevation myocardial infarction; MI, myocardial infarction; PCI, percutaneous coronary intervention; STEMI, ST-segment elevation myocardial infarction; TC, total cholesterol; TG, triglycerides

|                    | All STEMI+NSTEMI patients    |        |                                    |        |                                   |        | All STEMI+NSTEMI patients discharged alive               |       |                                                          |       |
|--------------------|------------------------------|--------|------------------------------------|--------|-----------------------------------|--------|----------------------------------------------------------|-------|----------------------------------------------------------|-------|
|                    | Death during hospitalization |        | Death within 30 days from MI onset |        | Death within 1 year from MI onset |        | Rehospitalization for HF within 1 year from MI discharge |       | Rehospitalization for MI within 1 year from MI discharge |       |
|                    | HR (95% CI)                  | p      | HR (95% CI)                        | p      | HR (95% CI)                       | p      | HR (95% CI)                                              | p     | HR (95% CI)                                              | p     |
| <b>Unadjusted</b>  |                              |        |                                    |        |                                   |        |                                                          |       |                                                          |       |
| TG in mmol/l       | <b>0.80 (0.75-0.85)</b>      | <0.001 | <b>0.68 (0.64-0.73)</b>            | <0.001 | <b>0.68 (0.65-0.71)</b>           | <0.001 | <b>0.91 (0.84-0.99)</b>                                  | 0.030 | 1.00 (0.94-1.06)                                         | 0.913 |
| Ordinal categories |                              |        |                                    |        |                                   |        |                                                          |       |                                                          |       |
| <1.7               | 1.00 (ref)                   |        | 1.00 (ref)                         |        | 1.00 (ref)                        |        | 1.00 (ref)                                               |       | 1.00 (ref)                                               |       |
| 1.7-2.2            | <b>0.76 (0.66-0.88)</b>      | <0.001 | <b>0.61 (0.53-0.70)</b>            | <0.001 | <b>0.60 (0.55-0.66)</b>           | <0.001 | 0.84 (0.67-1.05)                                         | 0.127 | 0.90 (0.70-1.16)                                         | 0.426 |
| 2.3-4.4            | <b>0.59 (0.49-0.71)</b>      | <0.001 | <b>0.45 (0.38-0.53)</b>            | <0.001 | <b>0.44 (0.40-0.50)</b>           | <0.001 | 0.84 (0.65-1.08)                                         | 0.173 | 1.06 (0.82-1.37)                                         | 0.680 |
| >=4.5              | <b>0.41 (0.24-0.70)</b>      | 0.001  | <b>0.27 (0.17-0.45)</b>            | <0.001 | <b>0.35 (0.26-0.47)</b>           | <0.001 | 0.52 (0.26-1.06)                                         | 0.072 | 1.02 (0.57-1.82)                                         | 0.944 |
| <b>Adjusted*</b>   |                              |        |                                    |        |                                   |        |                                                          |       |                                                          |       |
| TG in mmol/l       | 0.98 (0.90-1.06)             | 0.595  | 0.96 (0.89-1.03)                   | 0.242  | 0.96 (0.91-1.00)                  | 0.076  | 0.98 (0.90-1.06)                                         | 0.559 | 0.93 (0.84-1.04)                                         | 0.189 |
| Ordinal categories |                              |        |                                    |        |                                   |        |                                                          |       |                                                          |       |
| <1.7               | 1.00 (ref)                   |        | 1.00 (ref)                         |        | 1.00 (ref)                        |        | 1.00 (ref)                                               |       | 1.00 (ref)                                               |       |
| 1.7-2.2            | 1.02 (0.84-1.24)             | 0.856  | 0.96 (0.79-1.16)                   | 0.675  | 0.94 (0.83-1.07)                  | 0.344  | 0.87 (0.66-1.14)                                         | 0.311 | <b>0.85 (0.62-1.15)</b>                                  | 0.296 |
| 2.3-4.4            | 0.85 (0.65-1.12)             | 0.245  | 0.89 (0.70-1.13)                   | 0.336  | 0.87 (0.75-1.02)                  | 0.096  | 1.07 (0.79-1.44)                                         | 0.680 | 0.79 (0.56-1.12)                                         | 0.188 |
| >=4.5              | 0.70 (0.35-1.42)             | 0.328  | 0.61 (0.31-1.18)                   | 0.142  | 0.86 (0.59-1.23)                  | 0.402  | 0.54 (0.22-1.33)                                         | 0.180 | 0.80 (0.39-1.65)                                         | 0.551 |

**Supplementary Table 1. Unadjusted and adjusted analysis examining the correlations between triglyceride levels and the primary and secondary outcomes in ST elevation myocardial infarction (STEMI) and Non-ST elevation myocardial infarction (NSTEMI) patients who underwent percutaneous coronary intervention**  
\*adjusted for: oral medication for hyperlipidemia (yes/no/not applicable), age (numeric), sex (male/female), race (chinese/malay/indian/others), history of diabetes (yes/no), history of hypertension (yes/no), smoking status (never/former/current), history of AMI/CABG/PTCA (yes/no), BMI (numeric), Killip class on admission (1/2/3/4), CPR in ambulance/ED (yes/no), random blood glucose within 72h from onset (numeric), creatinine on admission (numeric), haemoglobin on admission (numeric), elevated first troponin within 72h from MI onset (yes/no), left ventricular ejection fraction <50% during hospitalization (yes/no)

|                    | All STEMI+NSTEMI patients    |        |                                    |        |                                   |        | All STEMI+NSTEMI patients discharged alive               |       |                                                          |       |
|--------------------|------------------------------|--------|------------------------------------|--------|-----------------------------------|--------|----------------------------------------------------------|-------|----------------------------------------------------------|-------|
|                    | Death during hospitalization |        | Death within 30 days from MI onset |        | Death within 1 year from MI onset |        | Rehospitalization for HF within 1 year from MI discharge |       | Rehospitalization for MI within 1 year from MI discharge |       |
|                    | HR (95% CI)                  | p      | HR (95% CI)                        | p      | HR (95% CI)                       | p      | HR (95% CI)                                              | p     | HR (95% CI)                                              | p     |
| <b>Unadjusted</b>  |                              |        |                                    |        |                                   |        |                                                          |       |                                                          |       |
| TC in mmol/l       | <b>0.78 (0.75-0.81)</b>      | <0.001 | <b>0.65 (0.63-0.68)</b>            | <0.001 | <b>0.69 (0.68-0.71)</b>           | <0.001 | 0.94 (0.89-1.00)                                         | 0.054 | 0.96 (0.90-1.03)                                         | 0.234 |
| Ordinal categories |                              |        |                                    |        |                                   |        |                                                          |       |                                                          |       |
| <5.2               | 1.00 (ref)                   |        | 1.00 (ref)                         |        | 1.00 (ref)                        |        | 1.00 (ref)                                               |       | 1.00 (ref)                                               |       |
| 5.2-6.1            | <b>0.58 (0.50-0.68)</b>      | <0.001 | <b>0.43 (0.37-0.49)</b>            | <0.001 | <b>0.47 (0.43-0.52)</b>           | <0.001 | <b>0.77 (0.62-0.96)</b>                                  | 0.020 | 0.87 (0.69-1.09)                                         | 0.233 |
| ≥6.2               | <b>0.52 (0.44-0.62)</b>      | <0.001 | <b>0.41 (0.35-0.48)</b>            | <0.001 | <b>0.48 (0.43-0.53)</b>           | <0.001 | 0.94 (0.75-1.17)                                         | 0.570 | 0.95 (0.74-1.22)                                         | 0.693 |
| <b>Adjusted*</b>   |                              |        |                                    |        |                                   |        |                                                          |       |                                                          |       |
| TC in mmol/l       | <b>0.81 (0.77-0.86)</b>      | <0.001 | <b>0.78 (0.74-0.82)</b>            | <0.001 | <b>0.87 (0.84-0.90)</b>           | <0.001 | 1.00 (0.93-1.07)                                         | 0.930 | 0.98 (0.90-1.07)                                         | 0.597 |
| Ordinal categories |                              |        |                                    |        |                                   |        |                                                          |       |                                                          |       |
| <5.2               | 1.00 (ref)                   |        | 1.00 (ref)                         |        | 1.00 (ref)                        |        | 1.00 (ref)                                               |       | 1.00 (ref)                                               |       |
| 5.2-6.1            | <b>0.73 (0.58-0.91)</b>      | 0.005  | <b>0.67 (0.55-0.83)</b>            | <0.001 | <b>0.82 (0.72-0.93)</b>           | 0.003  | 0.93 (0.71-1.22)                                         | 0.610 | 0.95 (0.70-1.28)                                         | 0.744 |
| ≥6.2               | <b>0.72 (0.56-0.93)</b>      | 0.011  | <b>0.70 (0.55-0.88)</b>            | 0.002  | <b>0.85 (0.74-0.99)</b>           | 0.035  | 1.12 (0.84-1.50)                                         | 0.441 | 0.92 (0.65-1.30)                                         | 0.634 |

**Supplementary Table 2. Unadjusted and adjusted analysis examining the correlations between total cholesterol levels and the primary and secondary outcomes ST elevation myocardial infarction (STEMI) and Non-ST elevation myocardial infarction (NSTEMI) patients who underwent percutaneous coronary intervention**

\*adjusted for: oral medication for hyperlipidemia (yes/no/not applicable), age (numeric), sex (male/female), race (chinese/malay/indian/others), history of diabetes (yes/no), history of hypertension (yes/no), smoking status (never/former/current), history of AMI/CABG/PTCA (yes/no), BMI (numeric), Killip class on admission (1/2/3/4), CPR in ambulance/ED (yes/no), random blood glucose within 72h from onset (numeric), creatinine on admission (numeric), haemoglobin on admission (numeric), elevated first troponin within 72h from MI onset (yes/no), left ventricular ejection fraction <50% during hospitalization (yes/no)

|                    | All STEMI+NSTEMI patients    |       |                                    |        |                                   |        | All STEMI+NSTEMI patients discharged alive               |       |                                                          |       |
|--------------------|------------------------------|-------|------------------------------------|--------|-----------------------------------|--------|----------------------------------------------------------|-------|----------------------------------------------------------|-------|
|                    | Death during hospitalization |       | Death within 30 days from MI onset |        | Death within 1 year from MI onset |        | Rehospitalization for HF within 1 year from MI discharge |       | Rehospitalization for MI within 1 year from MI discharge |       |
|                    | HR (95% CI)                  | p     | HR (95% CI)                        | p      | HR (95% CI)                       | p      | HR (95% CI)                                              | p     | HR (95% CI)                                              | p     |
| <b>Unadjusted</b>  |                              |       |                                    |        |                                   |        |                                                          |       |                                                          |       |
| HDL-C in mmol/l    | 0.89 (0.79-1.01)             | 0.075 | 0.90 (0.79-1.03)                   | 0.120  | <b>1.08 (1.00-1.17)</b>           | 0.037  | 0.88 (0.71-1.09)                                         | 0.239 | 0.93 (0.64-1.37)                                         | 0.720 |
| Ordinal categories |                              |       |                                    |        |                                   |        |                                                          |       |                                                          |       |
| >=1.6              | 1.00 (ref)                   |       | 1.00 (ref)                         |        | 1.00 (ref)                        |        | 1.00 (ref)                                               |       | 1.00 (ref)                                               |       |
| 1.0-1.5            | <b>0.82 (0.69-0.97)</b>      | 0.021 | <b>0.70 (0.60-0.82)</b>            | <0.001 | <b>0.66 (0.59-0.73)</b>           | <0.001 | 1.27 (0.88-1.83)                                         | 0.202 | 1.50 (0.97-2.33)                                         | 0.069 |
| <1.0               | 0.92 (0.78-1.09)             | 0.319 | <b>0.81 (0.69-0.95)</b>            | 0.011  | <b>0.69 (0.62-0.77)</b>           | <0.001 | 1.21 (0.84-1.75)                                         | 0.305 | 1.48 (0.96-2.29)                                         | 0.079 |
| <b>Adjusted*</b>   |                              |       |                                    |        |                                   |        |                                                          |       |                                                          |       |
| HDL-C in mmol/l    | <b>0.76 (0.63-0.93)</b>      | 0.006 | <b>0.66 (0.54-0.80)</b>            | <0.001 | <b>0.76 (0.68-0.86)</b>           | <0.001 | 0.90 (0.68-1.20)                                         | 0.469 | 1.20 (0.93-1.56)                                         | 0.162 |
| Ordinal categories |                              |       |                                    |        |                                   |        |                                                          |       |                                                          |       |
| >=1.6              | 1.00 (ref)                   |       | 1.00 (ref)                         |        | 1.00 (ref)                        |        | 1.00 (ref)                                               |       | 1.00 (ref)                                               |       |
| 1.0-1.5            | 0.96 (0.76-1.22)             | 0.727 | 1.03 (0.82-1.29)                   | 0.797  | 0.98 (0.85-1.13)                  | 0.789  | 1.07 (0.68-1.68)                                         | 0.780 | 1.38 (0.79-2.42)                                         | 0.262 |
| <1.0               | 1.19 (0.94-1.52)             | 0.156 | <b>1.41 (1.12-1.78)</b>            | 0.004  | <b>1.23 (1.06-1.43)</b>           | 0.008  | 1.16 (0.73-1.83)                                         | 0.534 | 1.24 (0.70-2.21)                                         | 0.462 |

**Supplementary Table 3. Unadjusted and adjusted analysis examining the correlations between high density lipoprotein cholesterol levels and the primary and secondary outcomes in ST elevation myocardial infarction (STEMI) and Non-ST elevation myocardial infarction (NSTEMI) patients who underwent percutaneous coronary intervention**

\*adjusted for: oral medication for hyperlipidemia (yes/no/not applicable), age (numeric), sex (male/female), race (chinese/malay/indian/others), history of diabetes (yes/no), history of hypertension (yes/no), smoking status (never/former/current), history of AMI/CABG/PTCA (yes/no), BMI (numeric), Killip class on admission (1/2/3/4), CPR in ambulance/ED (yes/no), random blood glucose within 72h from onset (numeric), creatinine on admission (numeric), haemoglobin on admission (numeric), elevated first troponin within 72h from MI onset (yes/no), left ventricular ejection fraction <50% during hospitalization (yes/no)

|                    | All STEMI patients           |        |                                    |        |                                   |        | All STEMI patients discharged alive                      |        |                                                          |       |
|--------------------|------------------------------|--------|------------------------------------|--------|-----------------------------------|--------|----------------------------------------------------------|--------|----------------------------------------------------------|-------|
|                    | Death during hospitalization |        | Death within 30 days from MI onset |        | Death within 1 year from MI onset |        | Rehospitalization for HF within 1 year from MI discharge |        | Rehospitalization for MI within 1 year from MI discharge |       |
|                    | HR (95% CI)                  | p      | HR (95% CI)                        | p      | HR (95% CI)                       | p      | HR (95% CI)                                              | p      | HR (95% CI)                                              | p     |
| <b>Unadjusted</b>  |                              |        |                                    |        |                                   |        |                                                          |        |                                                          |       |
| LDL-C in mmol/l    | <b>0.74 (0.68-0.81)</b>      | <0.001 | <b>0.63 (0.58-0.70)</b>            | <0.001 | <b>0.65 (0.60-0.70)</b>           | <0.001 | <b>0.82 (0.73-0.92)</b>                                  | 0.001  | <b>0.86 (0.76-0.98)</b>                                  | 0.027 |
| Ordinal categories |                              |        |                                    |        |                                   |        |                                                          |        |                                                          |       |
| <1.8               | 1.00 (ref)                   |        | 1.00 (ref)                         |        | 1.00 (ref)                        |        | 1.00 (ref)                                               |        | 1.00 (ref)                                               |       |
| 1.8-2.5            | <b>0.58 (0.43-0.77)</b>      | <0.001 | <b>0.39 (0.29-0.51)</b>            | <0.001 | <b>0.45 (0.36-0.57)</b>           | <0.001 | <b>0.54 (0.37-0.77)</b>                                  | 0.001  | 0.81 (0.50-1.31)                                         | 0.383 |
| 2.6-3.3            | <b>0.38 (0.28-0.52)</b>      | <0.001 | <b>0.24 (0.18-0.32)</b>            | <0.001 | <b>0.25 (0.20-0.32)</b>           | <0.001 | <b>0.45 (0.32-0.63)</b>                                  | <0.001 | <b>0.52 (0.32-0.84)</b>                                  | 0.007 |
| 3.4-4.0            | <b>0.34 (0.24-0.48)</b>      | <0.001 | <b>0.19 (0.13-0.25)</b>            | <0.001 | <b>0.19 (0.15-0.24)</b>           | <0.001 | <b>0.30 (0.21-0.44)</b>                                  | <0.001 | <b>0.47 (0.29-0.77)</b>                                  | 0.003 |
| 4.1-4.8            | <b>0.36 (0.24-0.54)</b>      | <0.001 | <b>0.18 (0.13-0.26)</b>            | <0.001 | <b>0.19 (0.14-0.25)</b>           | <0.001 | <b>0.35 (0.23-0.53)</b>                                  | <0.001 | <b>0.58 (0.35-0.98)</b>                                  | 0.040 |
| ≥4.9               | <b>0.34 (0.22-0.55)</b>      | <0.001 | <b>0.22 (0.15-0.33)</b>            | <0.001 | <b>0.26 (0.19-0.35)</b>           | <0.001 | <b>0.41 (0.26-0.64)</b>                                  | <0.001 | <b>0.55 (0.30-0.99)</b>                                  | 0.048 |
| <b>Adjusted*</b>   |                              |        |                                    |        |                                   |        |                                                          |        |                                                          |       |
| LDL in mmol/l      | <b>0.81 (0.70-0.93)</b>      | 0.003  | <b>0.79 (0.69-0.90)</b>            | <0.001 | <b>0.89 (0.81-0.99)</b>           | 0.024  | 1.02 (0.91-1.14)                                         | 0.700  | 0.85 (0.72-1.00)                                         | 0.052 |
| Ordinal categories |                              |        |                                    |        |                                   |        |                                                          |        |                                                          |       |
| <1.8               | 1.00 (ref)                   |        | 1.00 (ref)                         |        | 1.00 (ref)                        |        | 1.00 (ref)                                               |        | 1.00 (ref)                                               |       |
| 1.8-2.5            | 0.65 (0.43-1.00)             | 0.051  | <b>0.55 (0.37-0.82)</b>            | 0.004  | <b>0.73 (0.54-0.99)</b>           | 0.044  | 0.67 (0.42-1.07)                                         | 0.096  | 0.91 (0.51-1.61)                                         | 0.742 |
| 2.6-3.3            | <b>0.55 (0.35-0.87)</b>      | 0.010  | <b>0.43 (0.28-0.67)</b>            | <0.001 | <b>0.54 (0.39-0.75)</b>           | <0.001 | 0.83 (0.52-1.33)                                         | 0.442  | 0.70 (0.38-1.28)                                         | 0.246 |
| 3.4-4.0            | <b>0.53 (0.32-0.90)</b>      | 0.019  | <b>0.43 (0.26-0.70)</b>            | 0.001  | <b>0.55 (0.38-0.80)</b>           | 0.002  | 0.80 (0.48-1.33)                                         | 0.382  | 0.54 (0.28-1.06)                                         | 0.073 |
| 4.1-4.8            | <b>0.47 (0.25-0.89)</b>      | 0.021  | <b>0.33 (0.18-0.61)</b>            | <0.001 | <b>0.53 (0.34-0.83)</b>           | 0.005  | 0.79 (0.46-1.39)                                         | 0.419  | 0.69 (0.34-1.40)                                         | 0.299 |
| ≥4.9               | <b>0.40 (0.20-0.80)</b>      | 0.009  | <b>0.39 (0.21-0.73)</b>            | 0.003  | 0.71 (0.45-1.10)                  | 0.124  | 0.99 (0.54-1.82)                                         | 0.975  | 0.52 (0.22-1.21)                                         | 0.130 |

**Supplementary Table 4. Unadjusted and adjusted analysis examining the correlations between low density lipoprotein cholesterol levels and the primary and secondary outcomes in ST elevation myocardial infarction patients who underwent percutaneous coronary intervention**

\*adjusted for: oral medication for hyperlipidemia (yes/no/not applicable), age (numeric), sex (male/female), race (chinese/malay/indian/others), history of diabetes (yes/no), history of hypertension (yes/no), smoking status (never/former/current), history of AMI/CABG/PTCA (yes/no), BMI (numeric), Killip class on admission (1/2/3/4), CPR in ambulance/ED (yes/no), random blood glucose within 72h from onset (numeric), creatinine on admission (numeric), haemoglobin on admission (numeric), elevated first troponin within 72h from MI onset (yes/no), left ventricular ejection fraction <50% during hospitalization (yes/no), anterior MI (yes/no), symptom-to-balloon time (numeric)

|                    | All STEMI patients           |        |                                    |        |                                   |        | All STEMI patients discharged alive                      |        |                                                          |       |
|--------------------|------------------------------|--------|------------------------------------|--------|-----------------------------------|--------|----------------------------------------------------------|--------|----------------------------------------------------------|-------|
|                    | Death during hospitalization |        | Death within 30 days from MI onset |        | Death within 1 year from MI onset |        | Rehospitalization for HF within 1 year from MI discharge |        | Rehospitalization for MI within 1 year from MI discharge |       |
|                    | HR (95% CI)                  | p      | HR (95% CI)                        | p      | HR (95% CI)                       | p      | HR (95% CI)                                              | p      | HR (95% CI)                                              | p     |
| <b>Unadjusted</b>  |                              |        |                                    |        |                                   |        |                                                          |        |                                                          |       |
| TC in mmol/l       | <b>0.73 (0.67-0.79)</b>      | <0.001 | <b>0.61 (0.57-0.67)</b>            | <0.001 | <b>0.64 (0.60-0.69)</b>           | <0.001 | <b>0.81 (0.74-0.90)</b>                                  | <0.001 | <b>0.89 (0.80-1.00)</b>                                  | 0.050 |
| Ordinal categories |                              |        |                                    |        |                                   |        |                                                          |        |                                                          |       |
| <5.2               | 1.00 (ref)                   |        | 1.00 (ref)                         |        | 1.00 (ref)                        |        | 1.00 (ref)                                               |        | 1.00 (ref)                                               |       |
| 5.2-6.1            | <b>0.60 (0.46-0.79)</b>      | <0.001 | <b>0.49 (0.38-0.63)</b>            | <0.001 | <b>0.49 (0.40-0.60)</b>           | <0.001 | <b>0.65 (0.50-0.84)</b>                                  | 0.001  | 0.75 (0.55-1.02)                                         | 0.068 |
| ≥6.2               | <b>0.59 (0.43-0.81)</b>      | 0.001  | <b>0.46 (0.34-0.62)</b>            | <0.001 | <b>0.50 (0.40-0.63)</b>           | <0.001 | 0.76 (0.57-1.00)                                         | 0.054  | 0.95 (0.68-1.31)                                         | 0.746 |
| <b>Adjusted*</b>   |                              |        |                                    |        |                                   |        |                                                          |        |                                                          |       |
| TC in mmol/l       | <b>0.81 (0.72-0.91)</b>      | <0.001 | <b>0.76 (0.68-0.86)</b>            | <0.001 | <b>0.88 (0.81-0.96)</b>           | 0.004  | 0.99 (0.90-1.10)                                         | 0.894  | 0.88 (0.76-1.02)                                         | 0.098 |
| Ordinal categories |                              |        |                                    |        |                                   |        |                                                          |        |                                                          |       |
| <5.2               | 1.00 (ref)                   |        | 1.00 (ref)                         |        | 1.00 (ref)                        |        | 1.00 (ref)                                               |        | 1.00 (ref)                                               |       |
| 5.2-6.1            | 0.86 (0.58-1.27)             | 0.438  | 0.86 (0.59-1.24)                   | 0.405  | 0.95 (0.72-1.25)                  | 0.716  | 1.03 (0.73-1.44)                                         | 0.875  | 0.67 (0.43-1.06)                                         | 0.086 |
| ≥6.2               | <b>0.59 (0.35-0.99)</b>      | 0.047  | <b>0.53 (0.33-0.86)</b>            | 0.009  | 0.81 (0.58-1.13)                  | 0.213  | 1.16 (0.80-1.67)                                         | 0.434  | 0.85 (0.54-1.36)                                         | 0.507 |

**Supplementary Table 5. Unadjusted and adjusted analysis examining the correlations between total cholesterol levels and the primary and secondary outcomes in ST elevation myocardial infarction patients who underwent percutaneous coronary intervention**

\*adjusted for: oral medication for hyperlipidemia (yes/no/not applicable), age (numeric), sex (male/female), race (chinese/malay/indian/others), history of diabetes (yes/no), history of hypertension (yes/no), smoking status (never/former/current), history of AMI/CABG/PTCA (yes/no), BMI (numeric), Killip class on admission (1/2/3/4), CPR in ambulance/ED (yes/no), random blood glucose within 72h from onset (numeric), creatinine on admission (numeric), haemoglobin on admission (numeric), elevated first troponin within 72h from MI onset (yes/no), left ventricular ejection fraction <50% during hospitalization (yes/no), anterior MI (yes/no), symptom-to-balloon time (numeric)

|                    | All STEMI patients           |       |                                    |        |                                   |        | All STEMI patients discharged alive                      |       |                                                          |       |
|--------------------|------------------------------|-------|------------------------------------|--------|-----------------------------------|--------|----------------------------------------------------------|-------|----------------------------------------------------------|-------|
|                    | Death during hospitalization |       | Death within 30 days from MI onset |        | Death within 1 year from MI onset |        | Rehospitalization for HF within 1 year from MI discharge |       | Rehospitalization for MI within 1 year from MI discharge |       |
|                    | HR (95% CI)                  | p     | HR (95% CI)                        | p      | HR (95% CI)                       | p      | HR (95% CI)                                              | p     | HR (95% CI)                                              | p     |
| <b>Unadjusted</b>  |                              |       |                                    |        |                                   |        |                                                          |       |                                                          |       |
| TG in mmol/l       | <b>0.80 (0.70-0.91)</b>      | 0.001 | <b>0.67 (0.59-0.76)</b>            | <0.001 | <b>0.69 (0.62-0.76)</b>           | <0.001 | <b>0.86 (0.76-0.97)</b>                                  | 0.012 | 0.91 (0.81-1.03)                                         | 0.133 |
| Ordinal categories |                              |       |                                    |        |                                   |        |                                                          |       |                                                          |       |
| <1.7               | 1.00 (ref)                   |       | 1.00 (ref)                         |        | 1.00 (ref)                        |        | 1.00 (ref)                                               |       | 1.00 (ref)                                               |       |
| 1.7-2.2            | <b>0.75 (0.56-1.01)</b>      | 0.058 | <b>0.56 (0.42-0.75)</b>            | <0.001 | <b>0.65 (0.52-0.81)</b>           | <0.001 | 0.81 (0.61-1.08)                                         | 0.150 | <b>0.67 (0.46-0.97)</b>                                  | 0.033 |
| 2.3-4.4            | <b>0.63 (0.43-0.91)</b>      | 0.015 | <b>0.41 (0.29-0.59)</b>            | <0.001 | <b>0.38 (0.29-0.52)</b>           | <0.001 | 0.79 (0.57-1.08)                                         | 0.139 | 0.97 (0.68-1.38)                                         | 0.850 |
| >=4.5              | 0.62 (0.28-1.39)             | 0.243 | 0.48 (0.23-1.01)                   | 0.053  | <b>0.47 (0.26-0.85)</b>           | 0.013  | <b>0.37 (0.14-0.99)</b>                                  | 0.048 | 0.27 (0.07-1.10)                                         | 0.069 |
| <b>Adjusted*</b>   |                              |       |                                    |        |                                   |        |                                                          |       |                                                          |       |
| TG in mmol/l       | 0.99 (0.85-1.15)             | 0.898 | 0.97 (0.84-1.13)                   | 0.732  | 1.01 (0.91-1.12)                  | 0.903  | 0.96 (0.85-1.07)                                         | 0.443 | 0.88 (0.73-1.05)                                         | 0.155 |
| Ordinal categories |                              |       |                                    |        |                                   |        |                                                          |       |                                                          |       |
| <1.7               | 1.00 (ref)                   |       | 1.00 (ref)                         |        | 1.00 (ref)                        |        | 1.00 (ref)                                               |       | 1.00 (ref)                                               |       |
| 1.7-2.2            | 1.21 (0.78-1.86)             | 0.395 | 1.01 (0.66-1.54)                   | 0.964  | 1.24 (0.93-1.66)                  | 0.146  | 0.83 (0.58-1.20)                                         | 0.321 | <b>0.57 (0.35-0.93)</b>                                  | 0.025 |
| 2.3-4.4            | 1.40 (0.80-2.46)             | 0.238 | 0.94 (0.55-1.60)                   | 0.808  | 0.86 (0.58-1.27)                  | 0.441  | 0.98 (0.65-1.46)                                         | 0.911 | 0.74 (0.46-1.19)                                         | 0.209 |
| >=4.5              | 0.55 (0.08-3.95)             | 0.550 | 0.72 (0.18-2.96)                   | 0.653  | 0.79 (0.29-2.15)                  | 0.645  | 0.43 (0.11-1.68)                                         | 0.223 | 0.38 (0.10-1.53)                                         | 0.174 |

**Supplementary Table 6. Unadjusted and adjusted analysis examining the correlations between triglyceride levels and the primary and secondary outcomes in ST elevation myocardial infarction patients who underwent percutaneous coronary intervention**

\*adjusted for: oral medication for hyperlipidemia (yes/no/not applicable), age (numeric), sex (male/female), race (chinese/malay/indian/others), history of diabetes (yes/no), history of hypertension (yes/no), smoking status (never/former/current), history of AMI/CABG/PTCA (yes/no), BMI (numeric), Killip class on admission (1/2/3/4), CPR in ambulance/ED (yes/no), random blood glucose within 72h from onset (numeric), creatinine on admission (numeric), haemoglobin on admission (numeric), elevated first troponin within 72h from MI onset (yes/no), left ventricular ejection fraction <50% during hospitalization (yes/no), anterior MI (yes/no), symptom-to-balloon time (numeric)



|                         | All NSTEMI patients          |       |                                    |        |                                   |        | All NSTEMI patients discharged alive                     |        |                                                          |        |
|-------------------------|------------------------------|-------|------------------------------------|--------|-----------------------------------|--------|----------------------------------------------------------|--------|----------------------------------------------------------|--------|
|                         | Death during hospitalization |       | Death within 30 days from MI onset |        | Death within 1 year from MI onset |        | Rehospitalization for HF within 1 year from MI discharge |        | Rehospitalization for MI within 1 year from MI discharge |        |
|                         | HR (95% CI)                  | p     | HR (95% CI)                        | p      | HR (95% CI)                       | p      | HR (95% CI)                                              | p      | HR (95% CI)                                              | p      |
| <b>Unadjusted</b>       |                              |       |                                    |        |                                   |        |                                                          |        |                                                          |        |
| LDL-C in mmol/l         | <b>0.72 (0.59-0.88)</b>      | 0.001 | <b>0.56 (0.46-0.68)</b>            | <0.001 | <b>0.59 (0.53-0.66)</b>           | <0.001 | <b>0.77 (0.67-0.89)</b>                                  | 0.001  | <b>0.73 (0.63-0.83)</b>                                  | <0.001 |
| Ordinal categories <1.8 | 1.00 (ref)                   |       | 1.00 (ref)                         |        | 1.00 (ref)                        |        | 1.00 (ref)                                               |        | 1.00 (ref)                                               |        |
| 1.8-2.5                 | 0.67 (0.40-1.13)             | 0.135 | <b>0.44 (0.27-0.73)</b>            | 0.001  | <b>0.62 (0.46-0.83)</b>           | 0.001  | 0.71 (0.46-1.11)                                         | 0.131  | <b>0.65 (0.43-1.00)</b>                                  | 0.048  |
| 2.6-3.3                 | <b>0.55 (0.32-0.96)</b>      | 0.035 | <b>0.34 (0.20-0.57)</b>            | <0.001 | <b>0.30 (0.21-0.42)</b>           | <0.001 | <b>0.55 (0.35-0.86)</b>                                  | 0.008  | <b>0.62 (0.41-0.95)</b>                                  | 0.026  |
| 3.4-4.0                 | <b>0.28 (0.12-0.65)</b>      | 0.003 | <b>0.15 (0.07-0.31)</b>            | <0.001 | <b>0.25 (0.17-0.36)</b>           | <0.001 | <b>0.42 (0.25-0.68)</b>                                  | 0.001  | <b>0.36 (0.22-0.59)</b>                                  | <0.001 |
| 4.1-4.8                 | <b>0.25 (0.09-0.72)</b>      | 0.010 | <b>0.15 (0.07-0.35)</b>            | <0.001 | <b>0.16 (0.10-0.27)</b>           | <0.001 | <b>0.27 (0.14-0.52)</b>                                  | <0.001 | <b>0.25 (0.13-0.46)</b>                                  | <0.001 |
| ≥4.9                    | <b>0.20 (0.06-0.67)</b>      | 0.009 | <b>0.07 (0.02-0.27)</b>            | <0.001 | <b>0.20 (0.12-0.35)</b>           | <0.001 | <b>0.54 (0.30-0.97)</b>                                  | 0.041  | <b>0.35 (0.19-0.67)</b>                                  | 0.001  |
| <b>Adjusted*</b>        |                              |       |                                    |        |                                   |        |                                                          |        |                                                          |        |
| LDL-C in mmol/l         | 1.08 (0.84-1.38)             | 0.550 | 1.01 (0.79-1.28)                   | 0.957  | 0.91 (0.79-1.05)                  | 0.183  | 1.10 (0.94-1.29)                                         | 0.238  | 1.16 (1.00-1.35)                                         | 0.052  |
| Ordinal categories <1.8 | 1.00 (ref)                   |       | 1.00 (ref)                         |        | 1.00 (ref)                        |        | 1.00 (ref)                                               |        | 1.00 (ref)                                               |        |
| 1.8-2.5                 | 1.07 (0.55-2.08)             | 0.850 | 0.85 (0.47-1.54)                   | 0.593  | 1.05 (0.73-1.51)                  | 0.782  | 1.04 (0.57-1.91)                                         | 0.897  | 1.25 (0.68-2.31)                                         | 0.475  |
| 2.6-3.3                 | 1.33 (0.64-2.78)             | 0.443 | 0.88 (0.45-1.75)                   | 0.724  | 0.73 (0.47-1.12)                  | 0.148  | 1.27 (0.68-2.37)                                         | 0.446  | <b>2.40 (1.26-4.58)</b>                                  | 0.008  |
| 3.4-4.0                 | 0.41 (0.11-1.48)             | 0.175 | 0.36 (0.12-1.09)                   | 0.070  | 0.82 (0.49-1.38)                  | 0.453  | 1.68 (0.86-3.29)                                         | 0.129  | 1.78 (0.87-3.62)                                         | 0.113  |
| 4.1-4.8                 | 0.79 (0.21-3.00)             | 0.730 | 0.95 (0.35-2.62)                   | 0.923  | 0.71 (0.37-1.38)                  | 0.314  | 0.96 (0.39-2.36)                                         | 0.929  | 1.45 (0.59-3.57)                                         | 0.422  |
| ≥4.9                    | 0.70 (0.15-3.33)             | 0.650 | 0.44 (0.09-2.07)                   | 0.300  | 0.61 (0.28-1.30)                  | 0.199  | 1.80 (0.76-4.24)                                         | 0.181  | 2.22 (0.89-5.50)                                         | 0.086  |

**Supplementary Table 7. Unadjusted and adjusted analysis examining the correlations between low density lipoprotein cholesterol levels and the primary and secondary outcomes in non-ST elevation myocardial infarction patients who underwent percutaneous coronary intervention**

\*adjusted for: oral medication for hyperlipidemia (yes/no/not applicable), age (numeric), sex (male/female), race (chinese/malay/indian/others), history of diabetes (yes/no), history of hypertension (yes/no), smoking status (never/former/current), history of AMI/CABG/PTCA (yes/no), BMI (numeric), Killip class on admission (1/2/3/4), CPR in ambulance/ED (yes/no), random blood glucose within 72h from onset (numeric), creatinine on admission (numeric), haemoglobin on admission (numeric), elevated first troponin within 72h from MI onset (yes/no), left ventricular ejection fraction <50% during hospitalization (yes/no)

|                    | All NSTEMI patients          |        |                                    |        |                                   |        | All NSTEMI patients discharged alive                     |        |                                                          |        |
|--------------------|------------------------------|--------|------------------------------------|--------|-----------------------------------|--------|----------------------------------------------------------|--------|----------------------------------------------------------|--------|
|                    | Death during hospitalization |        | Death within 30 days from MI onset |        | Death within 1 year from MI onset |        | Rehospitalization for HF within 1 year from MI discharge |        | Rehospitalization for MI within 1 year from MI discharge |        |
|                    | HR (95% CI)                  | p      | HR (95% CI)                        | p      | HR (95% CI)                       | p      | HR (95% CI)                                              | p      | HR (95% CI)                                              | p      |
| <b>Unadjusted</b>  |                              |        |                                    |        |                                   |        |                                                          |        |                                                          |        |
| TC in mmol/l       | <b>0.69 (0.58-0.82)</b>      | <0.001 | <b>0.54 (0.45-0.64)</b>            | <0.001 | <b>0.59 (0.54-0.65)</b>           | <0.001 | <b>0.78 (0.69-0.88)</b>                                  | <0.001 | <b>0.76 (0.68-0.86)</b>                                  | <0.001 |
| Ordinal categories |                              |        |                                    |        |                                   |        |                                                          |        |                                                          |        |
| <5.2               | 1.00 (ref)                   |        | 1.00 (ref)                         |        | 1.00 (ref)                        |        | 1.00 (ref)                                               |        | 1.00 (ref)                                               |        |
| 5.2-6.1            | <b>0.36 (0.18-0.75)</b>      | 0.007  | <b>0.34 (0.19-0.61)</b>            | <0.001 | <b>0.36 (0.26-0.51)</b>           | <0.001 | <b>0.43 (0.29-0.65)</b>                                  | <0.001 | <b>0.57 (0.40-0.80)</b>                                  | 0.001  |
| ≥6.2               | <b>0.27 (0.11-0.68)</b>      | 0.005  | <b>0.19 (0.08-0.44)</b>            | <0.001 | <b>0.36 (0.25-0.52)</b>           | <0.001 | <b>0.66 (0.45-0.96)</b>                                  | 0.031  | <b>0.54 (0.36-0.80)</b>                                  | 0.002  |
| <b>Adjusted*</b>   |                              |        |                                    |        |                                   |        |                                                          |        |                                                          |        |
| TC in mmol/l       | 0.98 (0.78-1.23)             | 0.833  | 0.89 (0.72-1.11)                   | 0.299  | <b>0.89 (0.79-1.00)</b>           | 0.049  | 1.07 (0.93-1.22)                                         | 0.360  | 1.09 (0.96-1.24)                                         | 0.177  |
| Ordinal categories |                              |        |                                    |        |                                   |        |                                                          |        |                                                          |        |
| <5.2               | 1.00 (ref)                   |        | 1.00 (ref)                         |        | 1.00 (ref)                        |        | 1.00 (ref)                                               |        | 1.00 (ref)                                               |        |
| 5.2-6.1            | 0.31 (0.09-1.05)             | 0.060  | 0.44 (0.17-1.13)                   | 0.087  | 0.68 (0.43-1.06)                  | 0.090  | 0.90 (0.56-1.47)                                         | 0.683  | 1.33 (0.87-2.04)                                         | 0.183  |
| ≥6.2               | 0.66 (0.22-1.96)             | 0.455  | 0.74 (0.30-1.83)                   | 0.519  | 0.79 (0.49-1.28)                  | 0.331  | 1.28 (0.75-2.19)                                         | 0.359  | 1.07 (0.61-1.90)                                         | 0.807  |

**Supplementary Table 8. Unadjusted and adjusted analysis examining the correlations between total cholesterol levels and the primary and secondary outcomes in non-ST elevation myocardial infarction patients who underwent percutaneous coronary intervention**

\*adjusted for: oral medication for hyperlipidemia (yes/no/not applicable), age (numeric), sex (male/female), race (chinese/malay/indian/others), history of diabetes (yes/no), history of hypertension (yes/no), smoking status (never/former/current), history of AMI/CABG/PTCA (yes/no), BMI (numeric), Killip class on admission (1/2/3/4), CPR in ambulance/ED (yes/no), random blood glucose within 72h from onset (numeric), creatinine on admission (numeric), haemoglobin on admission (numeric), elevated first troponin within 72h from MI onset (yes/no), left ventricular ejection fraction <50% during hospitalization (yes/no)

|                    | All NSTEMI patients          |       |                                    |        |                                   |        | All NSTEMI patients discharged alive                     |       |                                                          |       |
|--------------------|------------------------------|-------|------------------------------------|--------|-----------------------------------|--------|----------------------------------------------------------|-------|----------------------------------------------------------|-------|
|                    | Death during hospitalization |       | Death within 30 days from MI onset |        | Death within 1 year from MI onset |        | Rehospitalization for HF within 1 year from MI discharge |       | Rehospitalization for MI within 1 year from MI discharge |       |
|                    | HR (95% CI)                  | p     | HR (95% CI)                        | p      | HR (95% CI)                       | p      | HR (95% CI)                                              | p     | HR (95% CI)                                              | p     |
| <b>Unadjusted</b>  |                              |       |                                    |        |                                   |        |                                                          |       |                                                          |       |
| TG in mmol/l       | <b>0.64 (0.48-0.87)</b>      | 0.004 | <b>0.47 (0.35-0.63)</b>            | <0.001 | <b>0.62 (0.53-0.71)</b>           | <0.001 | <b>0.75 (0.62-0.90)</b>                                  | 0.002 | 0.88 (0.77-1.01)                                         | 0.067 |
| Ordinal categories |                              |       |                                    |        |                                   |        |                                                          |       |                                                          |       |
| <1.7               | 1.00 (ref)                   |       | 1.00 (ref)                         |        | 1.00 (ref)                        |        | 1.00 (ref)                                               |       | 1.00 (ref)                                               |       |
| 1.7-2.2            | <b>0.49 (0.26-0.92)</b>      | 0.027 | <b>0.45 (0.26-0.78)</b>            | 0.004  | <b>0.45 (0.32-0.62)</b>           | <0.001 | <b>0.54 (0.36-0.79)</b>                                  | 0.002 | 0.78 (0.55-1.09)                                         | 0.149 |
| 2.3-4.4            | <b>0.28 (0.11-0.70)</b>      | 0.006 | <b>0.19 (0.08-0.43)</b>            | <0.001 | <b>0.41 (0.29-0.57)</b>           | <0.001 | <b>0.50 (0.33-0.75)</b>                                  | 0.001 | <b>0.64 (0.44-0.94)</b>                                  | 0.022 |
| >=4.5              | 0.38 (0.05-2.72)             | 0.333 | 0.18 (0.03-1.30)                   | 0.090  | <b>0.45 (0.21-0.95)</b>           | 0.037  | 0.44 (0.16-1.19)                                         | 0.106 | 1.17 (0.61-2.23)                                         | 0.635 |
| <b>Adjusted*</b>   |                              |       |                                    |        |                                   |        |                                                          |       |                                                          |       |
| TG in mmol/l       | 0.90 (0.63-1.28)             | 0.549 | 0.74 (0.53-1.04)                   | 0.083  | 0.92 (0.79-1.06)                  | 0.252  | 0.91 (0.76-1.10)                                         | 0.334 | 0.93 (0.79-1.11)                                         | 0.437 |
| Ordinal categories |                              |       |                                    |        |                                   |        |                                                          |       |                                                          |       |
| <1.7               | 1.00 (ref)                   |       | 1.00 (ref)                         |        | 1.00 (ref)                        |        | 1.00 (ref)                                               |       | 1.00 (ref)                                               |       |
| 1.7-2.2            | 1.14 (0.55-2.36)             | 0.718 | 1.18 (0.65-2.18)                   | 0.584  | 0.80 (0.54-1.18)                  | 0.266  | 0.73 (0.45-1.19)                                         | 0.208 | 1.03 (0.67-1.57)                                         | 0.899 |
| 2.3-4.4            | 0.85 (0.32-2.28)             | 0.753 | 0.51 (0.20-1.31)                   | 0.162  | 0.85 (0.56-1.30)                  | 0.459  | 0.79 (0.48-1.30)                                         | 0.352 | 0.65 (0.38-1.09)                                         | 0.105 |
| >=4.5              | Insufficient events          |       | Insufficient events                |        | 1.25 (0.54-2.87)                  | 0.602  | 0.63 (0.15-2.60)                                         | 0.523 | 1.47 (0.63-3.42)                                         | 0.374 |

**Supplementary Table 9. Unadjusted and adjusted analysis examining the correlations between triglyceride levels and the primary and secondary outcomes in non-ST elevation myocardial infarction patients who underwent percutaneous coronary intervention**

\*adjusted for: oral medication for hyperlipidemia (yes/no/not applicable), age (numeric), sex (male/female), race (chinese/malay/indian/others), history of diabetes (yes/no), history of hypertension (yes/no), smoking status (never/former/current), history of AMI/CABG/PTCA (yes/no), BMI (numeric), Killip class on admission (1/2/3/4), CPR in ambulance/ED (yes/no), random blood glucose within 72h from onset (numeric), creatinine on admission (numeric), haemoglobin on admission (numeric), elevated first troponin within 72h from MI onset (yes/no), left ventricular ejection fraction <50% during hospitalization (yes/no)
